# Supplementary material for: An Ochered Fossil Marine Shell From the Mousterian of Fumane Cave, Italy
Source: PubMed Central journal article supplement (PMC3707824; doi:10.1371/journal.pone.0068572), 2013-07-10

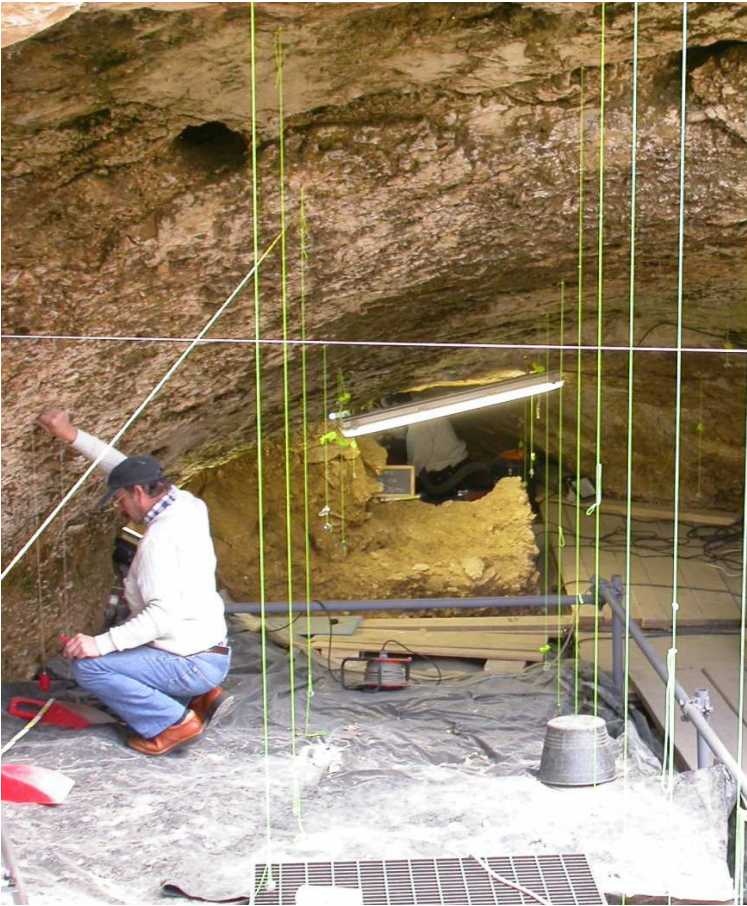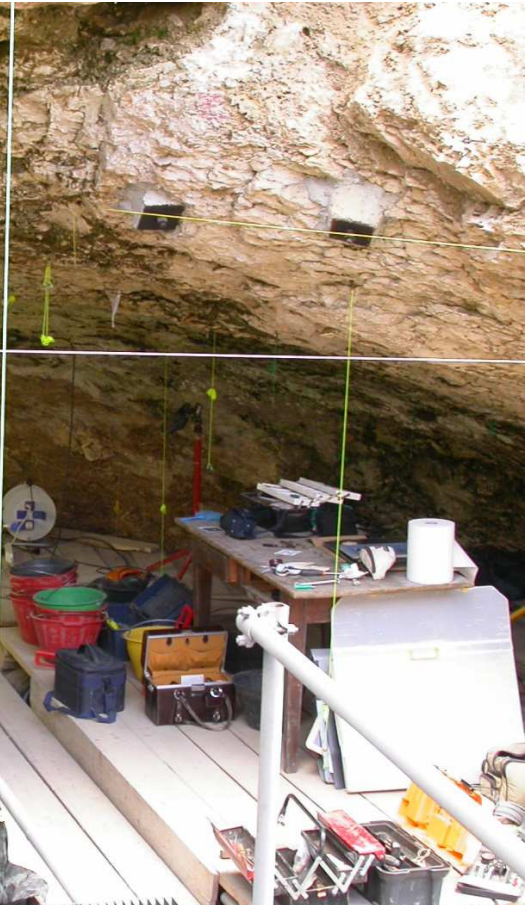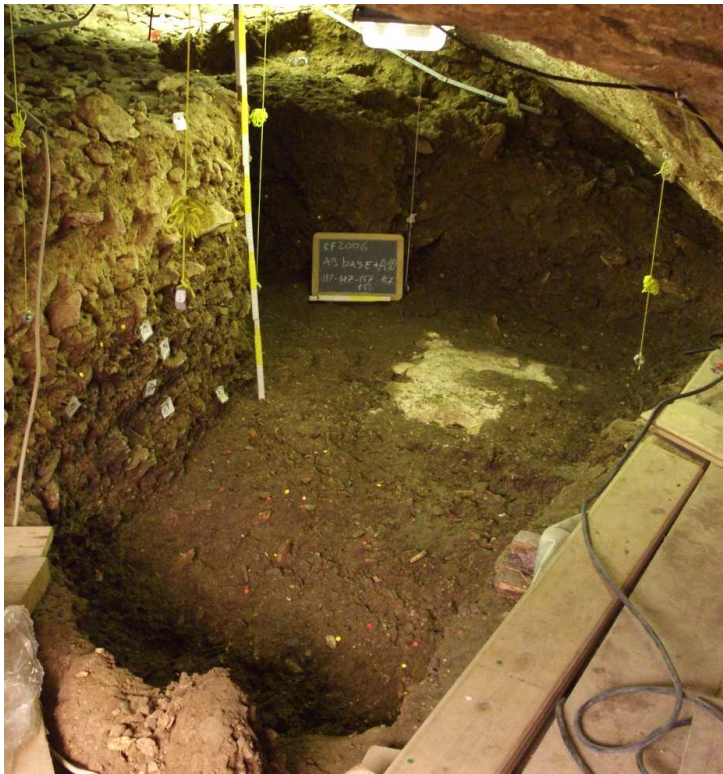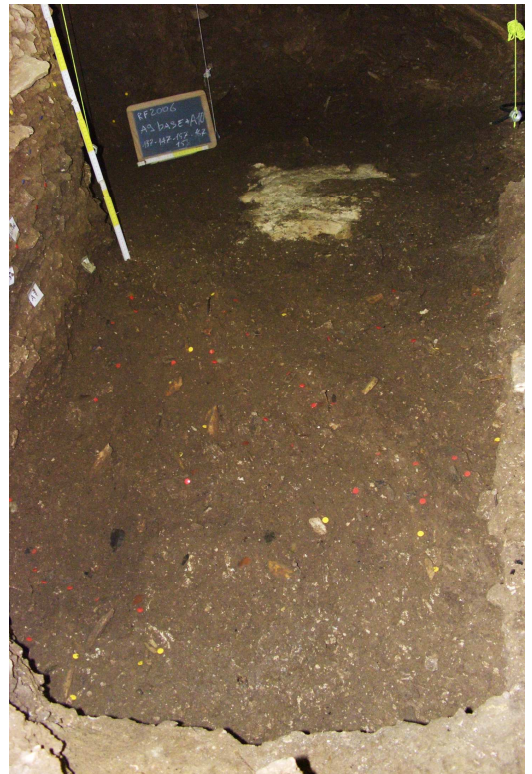

Supplement: pone.0068572.s003.pdf [file pone.0068572.s003.pdf]
